# Supplementary material for: In situ isotopic analysis of uranium using a new data acquisition protocol for 1013 ohm Faraday amplifiers
Source: Royal Society of Chemistry journal article supplement (doi:10.1039/d0ja00498g), 2021-01-01
Supplement: d0ja00498g1.pdf [file d0ja00498g1.pdf]

## Electronic Supplementary Information (ESI)

### ***In situ* isotopic analysis of uranium using a new data acquisition protocol for $10^{13}$ ohm Faraday amplifiers**

Kota Yamamoto,<sup>a</sup> Hisashi Asanuma,<sup>a</sup> Hiroaki Takahashi<sup>b</sup> and Takafumi Hirata<sup>\*a</sup>

<sup>a</sup> Geochemical Research Center, Graduate School of Science, The University of Tokyo, Hongo 7-3-1, Bunkyo-ku, Tokyo, 113-0033, Japan. E-mail: hrt1@eqchem.s.u-tokyo.ac.jp

<sup>b</sup> Regulatory Standard and Research Department, Secretariat of Nuclear Regulation Authority (S/NRA/R), Roppongi 1-9-9, Minato-ku, Tokyo, 106-8450, Japan.

**Table S1** Uranium isotopic data for zircons, titanites and synthetic glass materials

| Sample             | Spot | $^{235}\text{U}/^{238}\text{U} (\times 10^{-3})$ |          |                  |          | $^{234}\text{U}/^{238}\text{U} (\times 10^{-5})$ |         |                  |         | Ablated area ( $\mu\text{m}^2$ ) |
|--------------------|------|--------------------------------------------------|----------|------------------|----------|--------------------------------------------------|---------|------------------|---------|----------------------------------|
|                    |      | Tau correction <sup>a</sup>                      |          | CIM <sup>b</sup> |          | Tau correction <sup>a</sup>                      |         | CIM <sup>b</sup> |         |                                  |
| Nancy 91500 zircon | 1    | 7.2612                                           | ± 0.0836 | 7.2281           | ± 0.0428 | 3.52                                             | ± 6.63  | 5.80             | ± 3.04  | 75 × 75                          |
|                    | 2    | 7.2375                                           | ± 0.0841 | 7.2243           | ± 0.0397 | 3.40                                             | ± 7.98  | 4.82             | ± 2.81  | 75 × 75                          |
|                    | 3    | 7.2496                                           | ± 0.0687 | 7.2473           | ± 0.0392 | 3.43                                             | ± 7.82  | 4.06             | ± 2.77  | 75 × 75                          |
|                    | 4    | 7.2487                                           | ± 0.1165 | 7.3030           | ± 0.0393 | 3.69                                             | ± 5.89  | 4.85             | ± 2.78  | 75 × 75                          |
|                    | 5    | 7.2506                                           | ± 0.0915 | 7.2853           | ± 0.0385 | 5.83                                             | ± 10.32 | 6.08             | ± 2.71  | 75 × 75                          |
|                    | 6    | 7.2864                                           | ± 0.0946 | 7.2572           | ± 0.0388 | 9.15                                             | ± 3.98  | 7.11             | ± 2.74  | 75 × 75                          |
|                    | 7    | 7.2717                                           | ± 0.0624 | 7.2398           | ± 0.0375 | 4.68                                             | ± 7.31  | 5.19             | ± 2.64  | 75 × 75                          |
|                    | 8    | 7.2516                                           | ± 0.0690 | 7.2651           | ± 0.0370 | 3.23                                             | ± 4.80  | 3.68             | ± 2.60  | 75 × 75                          |
|                    | 9    | 7.2813                                           | ± 0.0895 | 7.2585           | ± 0.0375 | 3.83                                             | ± 4.19  | 6.03             | ± 2.64  | 75 × 75                          |
|                    | 10   | 7.2675                                           | ± 0.0862 | 7.2556           | ± 0.0374 | 4.77                                             | ± 6.17  | 5.46             | ± 2.63  | 75 × 75                          |
| AS3 zircon         | 1    | 7.2633                                           | ± 0.0193 | 7.2577           | ± 0.0083 | 5.16                                             | ± 0.97  | 5.85             | ± 0.44  | 75 × 75                          |
|                    | 2    | 7.2426                                           | ± 0.0235 | 7.2521           | ± 0.0086 | 5.49                                             | ± 1.32  | 5.84             | ± 0.45  | 75 × 75                          |
|                    | 3    | 7.2533                                           | ± 0.0184 | 7.2506           | ± 0.0054 | 5.52                                             | ± 1.07  | 5.70             | ± 0.24  | 75 × 75                          |
|                    | 4    | 7.2499                                           | ± 0.0243 | 7.2577           | ± 0.0048 | 5.59                                             | ± 0.72  | 5.69             | ± 0.19  | 75 × 75                          |
|                    | 5    | 7.2606                                           | ± 0.0228 | 7.2564           | ± 0.0094 | 5.55                                             | ± 1.50  | 5.70             | ± 0.52  | 75 × 75                          |
|                    | 6    | 7.2532                                           | ± 0.0254 | 7.2595           | ± 0.0092 | 5.80                                             | ± 1.04  | 6.06             | ± 0.50  | 75 × 75                          |
|                    | 7    | 7.2603                                           | ± 0.0359 | 7.2599           | ± 0.0088 | 6.05                                             | ± 1.05  | 5.73             | ± 0.47  | 75 × 75                          |
|                    | 8    | 7.2569                                           | ± 0.0271 | 7.2609           | ± 0.0089 | 5.62                                             | ± 1.25  | 5.86             | ± 0.48  | 75 × 75                          |
|                    | 9    | 7.2806                                           | ± 0.0627 | 7.2755           | ± 0.0212 | 7.04                                             | ± 2.50  | 6.28             | ± 1.39  | 75 × 75                          |
|                    | 10   | 7.2663                                           | ± 0.0224 | 7.2562           | ± 0.0052 | 5.09                                             | ± 0.99  | 5.53             | ± 0.22  | 75 × 75                          |
| FCT zircon         | 1    | 7.1675                                           | ± 0.0705 | 7.2462           | ± 0.0284 | 9.39                                             | ± 16.98 | 5.36             | ± 1.94  | 30 × 30                          |
|                    | 2    | 7.2073                                           | ± 0.0701 | 7.2480           | ± 0.0232 | 4.17                                             | ± 9.93  | 5.52             | ± 1.55  | 30 × 30                          |
|                    | 3    | 7.1913                                           | ± 0.0690 | 7.2586           | ± 0.0326 | -0.28                                            | ± 15.54 | 5.03             | ± 2.26  | 30 × 30                          |
|                    | 4    | 7.2095                                           | ± 0.0716 | 7.2527           | ± 0.0198 | 6.90                                             | ± 8.29  | 5.11             | ± 1.29  | 30 × 30                          |
|                    | 5    | 7.2046                                           | ± 0.0640 | 7.2597           | ± 0.0199 | 6.32                                             | ± 10.43 | 5.79             | ± 1.30  | 30 × 30                          |
|                    | 6    | 7.2928                                           | ± 0.2816 | 7.3961           | ± 0.3204 | 8.79                                             | ± 38.64 | 14.02            | ± 24.38 | 30 × 30                          |
|                    | 7    | 7.2010                                           | ± 0.0725 | 7.2351           | ± 0.0334 | -5.08                                            | ± 14.71 | 4.83             | ± 2.32  | 30 × 30                          |
|                    | 8    | 7.1943                                           | ± 0.0635 | 7.2627           | ± 0.0232 | 4.05                                             | ± 14.11 | 5.32             | ± 1.55  | 30 × 30                          |
|                    | 9    | 7.2005                                           | ± 0.0695 | 7.2486           | ± 0.0189 | 5.40                                             | ± 8.23  | 5.73             | ± 1.22  | 30 × 30                          |
|                    | 10   | 7.2068                                           | ± 0.0753 | 7.2526           | ± 0.0204 | 5.92                                             | ± 8.23  | 5.15             | ± 1.33  | 30 × 30                          |
|                    | 11   | 7.2220                                           | ± 0.0947 | 7.2799           | ± 0.0277 | 2.17                                             | ± 18.64 | 6.22             | ± 1.89  | 30 × 30                          |
|                    | 12   | 7.1807                                           | ± 0.0645 | 7.2560           | ± 0.0226 | 3.54                                             | ± 5.56  | 6.12             | ± 1.50  | 30 × 30                          |
|                    | 13   | 7.1949                                           | ± 0.0761 | 7.2454           | ± 0.0248 | 10.77                                            | ± 26.43 | 5.35             | ± 1.67  | 30 × 30                          |
|                    | 14   | 7.1950                                           | ± 0.0832 | 7.2732           | ± 0.0315 | 11.36                                            | ± 13.02 | 5.55             | ± 2.18  | 30 × 30                          |
| OD-3 zircon        | 1    | 7.2696                                           | ± 0.0240 | 7.2660           | ± 0.0103 | 6.03                                             | ± 2.42  | 5.42             | ± 0.57  | 75 × 75                          |
|                    | 2    | 7.2627                                           | ± 0.0425 | 7.2548           | ± 0.0157 | 5.61                                             | ± 2.74  | 5.75             | ± 0.98  | 75 × 75                          |
|                    | 3    | 7.2348                                           | ± 0.0214 | 7.2529           | ± 0.0078 | 4.91                                             | ± 0.95  | 5.17             | ± 0.40  | 75 × 75                          |
|                    | 4    | 7.2606                                           | ± 0.0276 | 7.2572           | ± 0.0125 | 5.25                                             | ± 2.05  | 5.22             | ± 0.74  | 75 × 75                          |
|                    | 5    | 7.2549                                           | ± 0.0159 | 7.2529           | ± 0.0078 | 5.57                                             | ± 0.77  | 5.39             | ± 0.39  | 75 × 75                          |
|                    | 6    | 7.2500                                           | ± 0.0224 | 7.2565           | ± 0.0072 | 5.70                                             | ± 1.16  | 5.61             | ± 0.35  | 75 × 75                          |
|                    | 7    | 7.2513                                           | ± 0.0299 | 7.2604           | ± 0.0114 | 5.51                                             | ± 1.71  | 5.23             | ± 0.66  | 75 × 75                          |
|                    | 8    | 7.2608                                           | ± 0.0403 | 7.2536           | ± 0.0147 | 6.33                                             | ± 1.30  | 6.01             | ± 0.90  | 60 × 60                          |
|                    | 9    | 7.2819                                           | ± 0.0658 | 7.2680           | ± 0.0280 | 5.06                                             | ± 2.71  | 5.86             | ± 1.91  | 60 × 60                          |
|                    | 10   | 7.2403                                           | ± 0.0360 | 7.2518           | ± 0.0075 | 5.58                                             | ± 0.80  | 5.32             | ± 0.37  | 60 × 60                          |
|                    | 11   | 7.2534                                           | ± 0.0293 | 7.3086           | ± 0.0128 | 5.99                                             | ± 1.17  | 7.50             | ± 0.76  | 60 × 60                          |
|                    | 12   | 7.2480                                           | ± 0.0242 | 7.2606           | ± 0.0098 | 5.55                                             | ± 1.09  | 5.48             | ± 0.54  | 60 × 60                          |
|                    | 13   | 7.2660                                           | ± 0.0468 | 7.2700           | ± 0.0160 | 6.35                                             | ± 3.02  | 5.92             | ± 1.00  | 60 × 60                          |
| PSV zircon         | 1    | 7.2590                                           | ± 0.0146 | 7.2584           | ± 0.0060 | 5.74                                             | ± 0.78  | 5.38             | ± 0.27  | 75 × 75                          |
|                    | 2    | 7.2557                                           | ± 0.0292 | 7.2567           | ± 0.0063 | 5.42                                             | ± 0.70  | 5.60             | ± 0.29  | 75 × 75                          |
|                    | 3    | 7.2586                                           | ± 0.0213 | 7.2575           | ± 0.0063 | 5.59                                             | ± 0.79  | 5.48             | ± 0.30  | 75 × 75                          |
|                    | 4    | 7.2566                                           | ± 0.0192 | 7.2632           | ± 0.0064 | 5.63                                             | ± 1.03  | 5.70             | ± 0.30  | 75 × 75                          |
|                    | 5    | 7.2522                                           | ± 0.0234 | 7.2595           | ± 0.0068 | 5.37                                             | ± 0.83  | 5.32             | ± 0.33  | 75 × 75                          |
|                    | 6    | 7.2679                                           | ± 0.0244 | 7.2545           | ± 0.0060 | 5.59                                             | ± 0.60  | 5.44             | ± 0.28  | 75 × 75                          |
|                    | 7    | 7.2457                                           | ± 0.0266 | 7.2539           | ± 0.0066 | 5.56                                             | ± 1.08  | 5.42             | ± 0.31  | 75 × 75                          |
|                    | 8    | 7.2523                                           | ± 0.0242 | 7.2597           | ± 0.0066 | 5.51                                             | ± 0.83  | 5.42             | ± 0.32  | 75 × 75                          |
|                    | 9    | 7.2449                                           | ± 0.0227 | 7.2524           | ± 0.0069 | 5.60                                             | ± 0.73  | 5.31             | ± 0.33  | 75 × 75                          |
|                    | 10   | 7.2544                                           | ± 0.0181 | 7.2598           | ± 0.0064 | 5.50                                             | ± 0.74  | 5.37             | ± 0.30  | 75 × 75                          |
|                    | 11   | 7.2547                                           | ± 0.0232 | 7.2614           | ± 0.0058 | 5.60                                             | ± 0.84  | 5.28             | ± 0.26  | 75 × 75                          |
|                    | 12   | 7.2474                                           | ± 0.0146 | 7.2586           | ± 0.0052 | 5.35                                             | ± 0.36  | 5.46             | ± 0.22  | 75 × 75                          |
|                    | 13   | 7.2666                                           | ± 0.0274 | 7.2558           | ± 0.0055 | 5.47                                             | ± 0.69  | 5.43             | ± 0.24  | 75 × 75                          |
|                    | 14   | 7.2554                                           | ± 0.0102 | 7.2551           | ± 0.0054 | 5.57                                             | ± 0.66  | 5.30             | ± 0.23  | 75 × 75                          |
|                    | 15   | 7.2536                                           | ± 0.0199 | 7.2588           | ± 0.0054 | 5.41                                             | ± 0.43  | 5.50             | ± 0.24  | 75 × 75                          |

Table S1 (Continued)

| Sample         | Spot | $^{235}\text{U}/^{238}\text{U} (\times 10^{-3})$ |          |                  |          | $^{234}\text{U}/^{238}\text{U} (\times 10^{-5})$ |        |                  |        | Ablated area ( $\mu\text{m}^2$ ) |
|----------------|------|--------------------------------------------------|----------|------------------|----------|--------------------------------------------------|--------|------------------|--------|----------------------------------|
|                |      | <i>Tau</i> correction <sup>a</sup>               |          | CIM <sup>b</sup> |          | <i>Tau</i> correction <sup>a</sup>               |        | CIM <sup>b</sup> |        |                                  |
| BLR-1 titanite | 1    | 7.2565                                           | ± 0.0214 | 7.2580           | ± 0.0051 | 5.67                                             | ± 0.66 | 5.51             | ± 0.21 | 75 × 75                          |
|                | 2    | 7.2644                                           | ± 0.0133 | 7.2633           | ± 0.0052 | 5.48                                             | ± 0.50 | 5.57             | ± 0.22 | 75 × 75                          |
|                | 3    | 7.2637                                           | ± 0.0237 | 7.2641           | ± 0.0051 | 5.64                                             | ± 0.49 | 5.58             | ± 0.22 | 75 × 75                          |
|                | 4    | 7.2673                                           | ± 0.0218 | 7.2666           | ± 0.0052 | 5.69                                             | ± 0.50 | 5.30             | ± 0.22 | 75 × 75                          |
|                | 5    | 7.2698                                           | ± 0.0199 | 7.2633           | ± 0.0052 | 5.84                                             | ± 1.00 | 5.45             | ± 0.22 | 75 × 75                          |
|                | 6    | 7.2522                                           | ± 0.0162 | 7.2583           | ± 0.0053 | 5.62                                             | ± 0.42 | 5.55             | ± 0.22 | 75 × 75                          |
|                | 7    | 7.2571                                           | ± 0.0155 | 7.2613           | ± 0.0052 | 5.67                                             | ± 0.59 | 5.37             | ± 0.22 | 75 × 75                          |
|                | 8    | 7.2680                                           | ± 0.0152 | 7.2641           | ± 0.0052 | 5.64                                             | ± 0.41 | 5.53             | ± 0.22 | 75 × 75                          |
|                | 9    | 7.2683                                           | ± 0.0123 | 7.2621           | ± 0.0052 | 5.51                                             | ± 0.40 | 5.53             | ± 0.22 | 75 × 75                          |
|                | 10   | 7.2666                                           | ± 0.0121 | 7.2648           | ± 0.0052 | 5.44                                             | ± 0.56 | 5.61             | ± 0.22 | 75 × 75                          |
| FCT titanite   | 1    | 7.2746                                           | ± 0.0350 | 7.2564           | ± 0.0159 | 5.53                                             | ± 1.68 | 5.40             | ± 0.99 | 75 × 75                          |
|                | 2    | 7.2752                                           | ± 0.0391 | 7.2807           | ± 0.0162 | 7.69                                             | ± 2.36 | 6.93             | ± 1.02 | 75 × 75                          |
|                | 3    | 7.2984                                           | ± 0.0347 | 7.2769           | ± 0.0153 | 6.80                                             | ± 1.87 | 7.09             | ± 0.95 | 75 × 75                          |
|                | 4    | 7.2876                                           | ± 0.0304 | 7.2672           | ± 0.0195 | 7.30                                             | ± 2.49 | 7.01             | ± 1.27 | 75 × 75                          |
|                | 5    | 7.2796                                           | ± 0.0330 | 7.2681           | ± 0.0189 | 5.71                                             | ± 3.44 | 6.94             | ± 1.22 | 75 × 75                          |
|                | 6    | 7.2832                                           | ± 0.0343 | 7.2745           | ± 0.0146 | 7.39                                             | ± 2.66 | 5.65             | ± 0.90 | 75 × 75                          |
|                | 7    | 7.2853                                           | ± 0.0340 | 7.2700           | ± 0.0127 | 5.39                                             | ± 1.94 | 5.81             | ± 0.75 | 75 × 75                          |
|                | 8    | 7.2799                                           | ± 0.0277 | 7.2650           | ± 0.0127 | 6.96                                             | ± 2.21 | 6.46             | ± 0.75 | 75 × 75                          |
|                | 9    | 7.2585                                           | ± 0.0372 | 7.2632           | ± 0.0159 | 7.04                                             | ± 3.59 | 6.08             | ± 0.99 | 75 × 75                          |
|                | 10   | 7.2230                                           | ± 0.0342 | 7.2043           | ± 0.0139 | 6.68                                             | ± 2.52 | 6.86             | ± 0.85 | 75 × 75                          |
|                | 11   | 7.2286                                           | ± 0.0408 | 7.2303           | ± 0.0146 | 6.81                                             | ± 2.26 | 6.30             | ± 0.90 | 75 × 75                          |
|                | 12   | 7.2273                                           | ± 0.0585 | 7.1621           | ± 0.0245 | 9.28                                             | ± 5.15 | 8.44             | ± 1.65 | 75 × 75                          |
|                | 13   | 7.3015                                           | ± 0.0321 | 7.2653           | ± 0.0219 | 8.34                                             | ± 3.32 | 6.66             | ± 1.44 | 75 × 75                          |
|                | 14   | 7.2875                                           | ± 0.0295 | 7.2671           | ± 0.0161 | 6.90                                             | ± 2.79 | 6.96             | ± 1.01 | 75 × 75                          |
|                | 15   | 7.2777                                           | ± 0.0315 | 7.2400           | ± 0.0145 | 6.92                                             | ± 1.54 | 6.05             | ± 0.89 | 75 × 75                          |
|                | 16   | 7.2591                                           | ± 0.0417 | 7.2507           | ± 0.0170 | 6.74                                             | ± 3.37 | 7.40             | ± 1.08 | 75 × 75                          |
|                | 17   | 7.2640                                           | ± 0.0309 | 7.2425           | ± 0.0140 | 6.52                                             | ± 2.29 | 6.14             | ± 0.85 | 75 × 75                          |
|                | 18   | 7.2667                                           | ± 0.0317 | 7.2606           | ± 0.0146 | 5.68                                             | ± 2.51 | 6.19             | ± 0.90 | 75 × 75                          |
| MKED1 titanite | 1    | 7.2842                                           | ± 0.0259 | 7.2613           | ± 0.0101 | 6.12                                             | ± 1.41 | 5.74             | ± 0.56 | 75 × 75                          |
|                | 2    | 7.2646                                           | ± 0.0100 | 7.2700           | ± 0.0103 | 5.93                                             | ± 0.98 | 5.50             | ± 0.57 | 75 × 75                          |
|                | 3    | 7.2536                                           | ± 0.0297 | 7.2700           | ± 0.0102 | 4.97                                             | ± 0.98 | 5.54             | ± 0.57 | 75 × 75                          |
|                | 4    | 7.2787                                           | ± 0.0233 | 7.2690           | ± 0.0098 | 5.96                                             | ± 1.46 | 5.82             | ± 0.54 | 75 × 75                          |
|                | 5    | 7.2670                                           | ± 0.0305 | 7.2649           | ± 0.0099 | 5.87                                             | ± 1.23 | 5.35             | ± 0.55 | 75 × 75                          |
|                | 6    | 7.2727                                           | ± 0.0324 | 7.2664           | ± 0.0100 | 5.78                                             | ± 1.09 | 5.26             | ± 0.56 | 75 × 75                          |
|                | 7    | 7.2711                                           | ± 0.0241 | 7.2599           | ± 0.0097 | 5.76                                             | ± 0.83 | 5.53             | ± 0.54 | 75 × 75                          |
|                | 8    | 7.2708                                           | ± 0.0320 | 7.2635           | ± 0.0099 | 5.44                                             | ± 2.09 | 5.38             | ± 0.54 | 75 × 75                          |
|                | 9    | 7.2788                                           | ± 0.0322 | 7.2703           | ± 0.0098 | 6.40                                             | ± 1.22 | 5.47             | ± 0.54 | 75 × 75                          |
|                | 10   | 7.2674                                           | ± 0.0291 | 7.2729           | ± 0.0097 | 5.72                                             | ± 1.23 | 5.53             | ± 0.53 | 75 × 75                          |
| OLT1 titanite  | 1    | 7.2599                                           | ± 0.0262 | 7.2636           | ± 0.0052 | 5.45                                             | ± 0.37 | 5.56             | ± 0.22 | 75 × 75                          |
|                | 2    | 7.2592                                           | ± 0.0183 | 7.2654           | ± 0.0053 | 5.35                                             | ± 0.68 | 5.50             | ± 0.23 | 75 × 75                          |
|                | 3    | 7.2616                                           | ± 0.0281 | 7.2637           | ± 0.0054 | 5.66                                             | ± 0.25 | 5.61             | ± 0.23 | 75 × 75                          |
|                | 4    | 7.2620                                           | ± 0.0157 | 7.2619           | ± 0.0054 | 5.76                                             | ± 0.32 | 5.50             | ± 0.23 | 75 × 75                          |
|                | 5    | 7.2643                                           | ± 0.0201 | 7.2568           | ± 0.0054 | 5.54                                             | ± 0.53 | 5.52             | ± 0.23 | 75 × 75                          |
|                | 6    | 7.2513                                           | ± 0.0259 | 7.2589           | ± 0.0054 | 5.59                                             | ± 0.58 | 5.43             | ± 0.23 | 75 × 75                          |
|                | 7    | 7.2538                                           | ± 0.0151 | 7.2613           | ± 0.0054 | 5.50                                             | ± 0.39 | 5.51             | ± 0.23 | 75 × 75                          |
|                | 8    | 7.2585                                           | ± 0.0234 | 7.2595           | ± 0.0055 | 5.40                                             | ± 0.66 | 5.40             | ± 0.24 | 75 × 75                          |
|                | 9    | 7.2615                                           | ± 0.0189 | 7.2606           | ± 0.0053 | 5.64                                             | ± 0.56 | 5.53             | ± 0.23 | 75 × 75                          |
|                | 10   | 7.2553                                           | ± 0.0268 | 7.2639           | ± 0.0055 | 5.67                                             | ± 0.51 | 5.72             | ± 0.24 | 75 × 75                          |

Table S1 (Continued)

| Sample                                      | Spot | $^{235}\text{U}/^{238}\text{U} (\times 10^{-3})$ |          |                  |          | $^{234}\text{U}/^{238}\text{U} (\times 10^{-5})$ |        |                  |        | Ablated area ( $\mu\text{m}^2$ ) |
|---------------------------------------------|------|--------------------------------------------------|----------|------------------|----------|--------------------------------------------------|--------|------------------|--------|----------------------------------|
|                                             |      | <i>Tau</i> correction <sup>a</sup>               |          | CIM <sup>b</sup> |          | <i>Tau</i> correction <sup>a</sup>               |        | CIM <sup>b</sup> |        |                                  |
| NIST SRM 610                                | 1    | 2.3822                                           | ± 0.0146 | 2.3901           | ± 0.0036 | 1.15                                             | ± 0.53 | 1.44             | ± 0.20 | 75 × 75                          |
|                                             | 2    | 2.3874                                           | ± 0.0118 | 2.3908           | ± 0.0037 | 1.00                                             | ± 0.60 | 1.29             | ± 0.21 | 75 × 75                          |
|                                             | 3    | 2.3865                                           | ± 0.0104 | 2.3860           | ± 0.0036 | 1.58                                             | ± 0.97 | 1.27             | ± 0.21 | 75 × 75                          |
|                                             | 4    | 2.3914                                           | ± 0.0093 | 2.3897           | ± 0.0036 | 1.26                                             | ± 0.62 | 1.24             | ± 0.21 | 75 × 75                          |
|                                             | 5    | 2.3856                                           | ± 0.0059 | 2.3906           | ± 0.0036 | 1.16                                             | ± 0.93 | 1.37             | ± 0.21 | 75 × 75                          |
|                                             | 6    | 2.3878                                           | ± 0.0073 | 2.3879           | ± 0.0037 | 1.38                                             | ± 0.58 | 1.40             | ± 0.21 | 75 × 75                          |
|                                             | 7    | 2.3814                                           | ± 0.0099 | 2.3852           | ± 0.0037 | 1.18                                             | ± 0.40 | 1.36             | ± 0.21 | 75 × 75                          |
|                                             | 8    | 2.3847                                           | ± 0.0101 | 2.3858           | ± 0.0036 | 1.38                                             | ± 0.67 | 1.31             | ± 0.21 | 75 × 75                          |
|                                             | 9    | 2.3891                                           | ± 0.0047 | 2.3857           | ± 0.0037 | 1.51                                             | ± 0.77 | 1.35             | ± 0.21 | 75 × 75                          |
|                                             | 10   | 2.3858                                           | ± 0.0086 | 2.3868           | ± 0.0036 | 1.06                                             | ± 0.50 | 1.18             | ± 0.21 | 75 × 75                          |
| NBS SRM 610                                 | 1    | 2.3893                                           | ± 0.0061 | 2.3868           | ± 0.0036 | 1.23                                             | ± 0.68 | 1.26             | ± 0.21 | 75 × 75                          |
|                                             | 2    | 2.3890                                           | ± 0.0089 | 2.3882           | ± 0.0035 | 1.20                                             | ± 0.51 | 1.30             | ± 0.20 | 75 × 75                          |
|                                             | 3    | 2.3916                                           | ± 0.0093 | 2.3912           | ± 0.0036 | 1.27                                             | ± 0.47 | 1.43             | ± 0.20 | 75 × 75                          |
|                                             | 4    | 2.3934                                           | ± 0.0072 | 2.3916           | ± 0.0036 | 1.23                                             | ± 0.60 | 1.21             | ± 0.20 | 75 × 75                          |
|                                             | 5    | 2.3937                                           | ± 0.0157 | 2.3905           | ± 0.0036 | 1.17                                             | ± 0.47 | 1.34             | ± 0.21 | 75 × 75                          |
|                                             | 6    | 2.3920                                           | ± 0.0083 | 2.3888           | ± 0.0035 | 1.28                                             | ± 0.51 | 1.14             | ± 0.20 | 75 × 75                          |
|                                             | 7    | 2.3931                                           | ± 0.0132 | 2.3926           | ± 0.0034 | 1.14                                             | ± 0.70 | 1.25             | ± 0.19 | 75 × 75                          |
|                                             | 8    | 2.3916                                           | ± 0.0122 | 2.3897           | ± 0.0035 | 1.32                                             | ± 0.52 | 1.31             | ± 0.19 | 75 × 75                          |
|                                             | 9    | 2.3946                                           | ± 0.0138 | 2.3901           | ± 0.0035 | 1.37                                             | ± 0.52 | 1.32             | ± 0.20 | 75 × 75                          |
|                                             | 10   | 2.3899                                           | ± 0.0127 | 2.3929           | ± 0.0036 | 1.25                                             | ± 0.74 | 1.22             | ± 0.20 | 75 × 75                          |
| NIST SRM 610<br>(MS interference corrected) | 1    | 2.3777                                           | ± 0.0146 | 2.3855           | ± 0.0036 | 0.70                                             | ± 0.53 | 1.00             | ± 0.20 | 75 × 75                          |
|                                             | 2    | 2.3828                                           | ± 0.0118 | 2.3863           | ± 0.0037 | 0.56                                             | ± 0.60 | 0.85             | ± 0.21 | 75 × 75                          |
|                                             | 3    | 2.3820                                           | ± 0.0104 | 2.3814           | ± 0.0036 | 1.14                                             | ± 0.97 | 0.83             | ± 0.21 | 75 × 75                          |
|                                             | 4    | 2.3868                                           | ± 0.0093 | 2.3852           | ± 0.0036 | 0.82                                             | ± 0.62 | 0.81             | ± 0.21 | 75 × 75                          |
|                                             | 5    | 2.3811                                           | ± 0.0059 | 2.3860           | ± 0.0036 | 0.72                                             | ± 0.93 | 0.93             | ± 0.21 | 75 × 75                          |
|                                             | 6    | 2.3833                                           | ± 0.0073 | 2.3834           | ± 0.0037 | 0.94                                             | ± 0.58 | 0.96             | ± 0.21 | 75 × 75                          |
|                                             | 7    | 2.3768                                           | ± 0.0099 | 2.3806           | ± 0.0037 | 0.73                                             | ± 0.40 | 0.93             | ± 0.21 | 75 × 75                          |
|                                             | 8    | 2.3801                                           | ± 0.0101 | 2.3812           | ± 0.0036 | 0.93                                             | ± 0.67 | 0.88             | ± 0.21 | 75 × 75                          |
|                                             | 9    | 2.3846                                           | ± 0.0047 | 2.3811           | ± 0.0037 | 1.06                                             | ± 0.77 | 0.92             | ± 0.21 | 75 × 75                          |
|                                             | 10   | 2.3812                                           | ± 0.0086 | 2.3823           | ± 0.0036 | 0.61                                             | ± 0.50 | 0.74             | ± 0.21 | 75 × 75                          |
| NBS SRM 610<br>(MS interference corrected)  | 1    | 2.3843                                           | ± 0.0061 | 2.3818           | ± 0.0036 | 0.75                                             | ± 0.68 | 0.79             | ± 0.21 | 75 × 75                          |
|                                             | 2    | 2.3839                                           | ± 0.0089 | 2.3831           | ± 0.0035 | 0.71                                             | ± 0.51 | 0.83             | ± 0.20 | 75 × 75                          |
|                                             | 3    | 2.3866                                           | ± 0.0093 | 2.3862           | ± 0.0036 | 0.78                                             | ± 0.47 | 0.96             | ± 0.20 | 75 × 75                          |
|                                             | 4    | 2.3883                                           | ± 0.0072 | 2.3866           | ± 0.0036 | 0.74                                             | ± 0.60 | 0.74             | ± 0.20 | 75 × 75                          |
|                                             | 5    | 2.3887                                           | ± 0.0157 | 2.3854           | ± 0.0036 | 0.68                                             | ± 0.47 | 0.87             | ± 0.21 | 75 × 75                          |
|                                             | 6    | 2.3869                                           | ± 0.0083 | 2.3838           | ± 0.0035 | 0.80                                             | ± 0.51 | 0.67             | ± 0.20 | 75 × 75                          |
|                                             | 7    | 2.3881                                           | ± 0.0132 | 2.3875           | ± 0.0034 | 0.65                                             | ± 0.70 | 0.78             | ± 0.19 | 75 × 75                          |
|                                             | 8    | 2.3865                                           | ± 0.0122 | 2.3847           | ± 0.0035 | 0.83                                             | ± 0.52 | 0.83             | ± 0.19 | 75 × 75                          |
|                                             | 9    | 2.3896                                           | ± 0.0138 | 2.3851           | ± 0.0035 | 0.88                                             | ± 0.52 | 0.85             | ± 0.20 | 75 × 75                          |
|                                             | 10   | 2.3849                                           | ± 0.0127 | 2.3878           | ± 0.0036 | 0.76                                             | ± 0.74 | 0.75             | ± 0.20 | 75 × 75                          |

Mass biases on the  $^{235}\text{U}/^{238}\text{U}$  and  $^{234}\text{U}/^{238}\text{U}$  ratios were corrected by those of the GJ-1 zircon (see main text for details). These uncertainties mean two times standard deviation of the median.

<sup>a</sup> Calculated from data sets at plateaus in the time profile of  $^{235}\text{U}/^{238}\text{U}$  ratio based on the conventional *tau* correction method

<sup>b</sup> Calculated by the present CIM method, where the uncertainty was estimated based on propagation of counting statistics on both signal and background

**Table S2** Effect of *tau* factor onto the measured  $^{235}\text{U}/^{238}\text{U}$  ratio

| <i>Tau</i> factor       | $^{235}\text{U}/^{238}\text{U} (\times 10^{-3})$ |                        |
|-------------------------|--------------------------------------------------|------------------------|
|                         | <i>Tau</i> correction <sup>a</sup>               | CIM <sup>b</sup>       |
| 0.25                    | 1.9500 ± 0.0113                                  | 1.9635 ± 0.0030        |
| 0.45                    | 1.9591 ± 0.0080                                  | 1.9635 ± 0.0030        |
| <b>0.65<sup>†</sup></b> | <b>1.9682 ± 0.0071</b>                           | <b>1.9635 ± 0.0030</b> |
| 0.85                    | 1.9773 ± 0.0092                                  | 1.9635 ± 0.0030        |
| 1.05                    | 1.9864 ± 0.0130                                  | 1.9635 ± 0.0030        |

<sup>†</sup> Optimum *tau* factor

Uncertainty is two times standard deviation of the median.

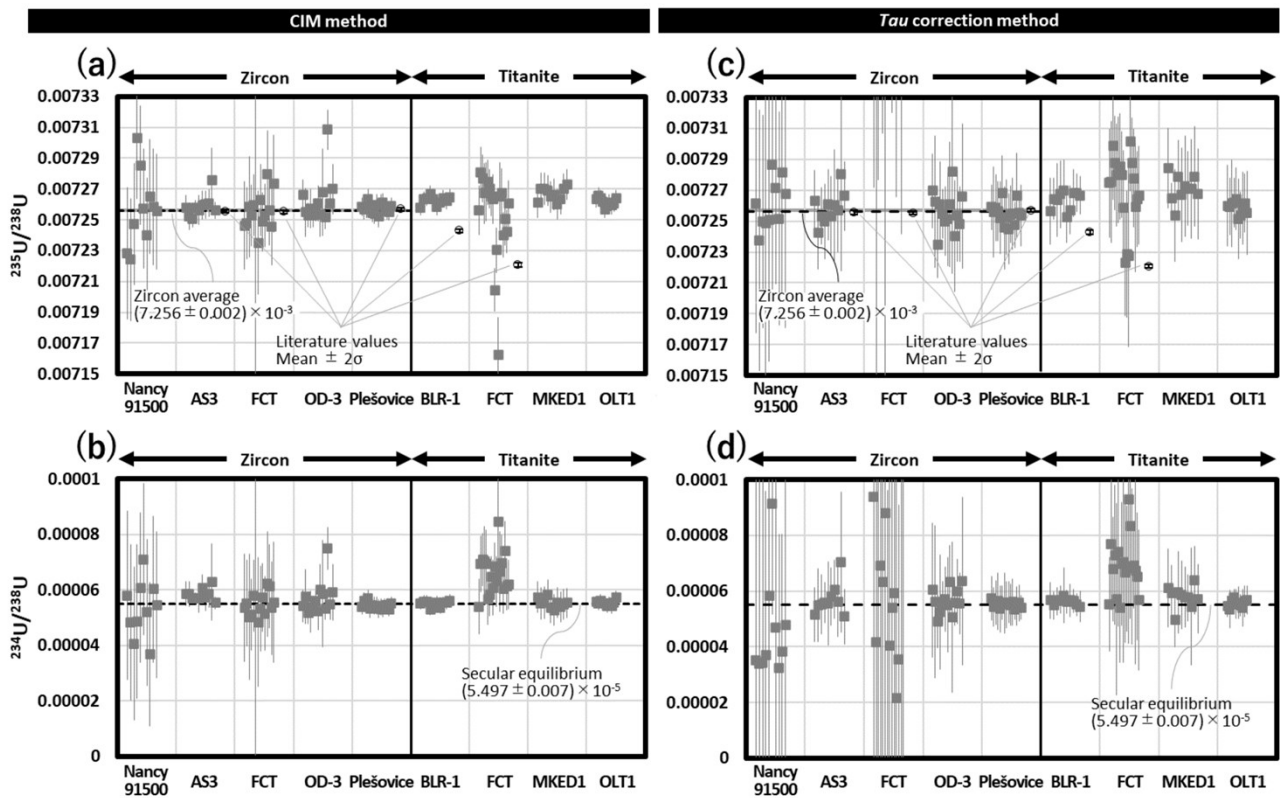

**Fig. S1** Comparison of the resulting  $^{235}\text{U}/^{238}\text{U}$  and  $^{234}\text{U}/^{238}\text{U}$  ratios of zircons and titanites obtained by the CIM (a, b) and conventional  $\tau$  correction methods (c, d). Note that the precision of the  $^{235}\text{U}/^{238}\text{U}$  and  $^{234}\text{U}/^{238}\text{U}$  ratios with the CIM method were 2 to 10 times better than those achieved by the  $\tau$  correction method. Isotopic ratio data from individual signal events are shown as grey squares. The dashed lines are the averaged  $^{235}\text{U}/^{238}\text{U}$  ratio for zircons reported by Hiess *et al.*,<sup>1</sup> and an expected  $^{234}\text{U}/^{238}\text{U}$  ratio of materials in secular equilibrium. The  $^{234}\text{U}/^{238}\text{U}$  ratio of minerals in a secular equilibrium is calculated from the decay constants of  $\lambda_{234} = (2.82206 \pm 0.00080) \times 10^{-6}$  and  $\lambda_{238} = (1.55125 \pm 0.00083) \times 10^{-10}$ .<sup>2,3</sup> Mass bias was corrected using the GJ-1 zircon as a bracketing standard. The error bars were calculated based on propagation of counting statistics and baseline noise.

### Supplementary references

1. J. Hiess, D. J. Condon, N. McLean and S. R. Noble, *Science*, 2012, **335**, 1610–1614.
2. H. Cheng, R. L. Edwards, C.-C. Shen, V. J. Polyak, Y. Asmerom, J. Woodhead, J. Hellstrom, Y. Wang, X. Kong, C. Spot, X. Wang and E. C. Alexander Jr, *Earth Planet. Sci. Lett.*, 2013, **371–372**, 82–91.
3. A. H. Jaffey, K. F. Flynn, L. E. Glendenin, W. C. Bentley and A. M. Essling, *Phys. Rev. C*, 1971, **4**, 1889–1906.
